# Supplementary material for: Probiotic modulation of gut microbiota by Bacillus coagulans MTCC 5856 in healthy subjects: A randomized, double-blind, placebo-control study
Source: PubMed Central journal article supplement (PMC10194586; doi:10.1097/md.0000000000033751), 2023-05-17
Supplement: medi-102-e33751-s001.pdf [file medi-102-e33751-s001.pdf]

## 15 **Supplementary Methods**

### 16 **Clinical Study Design**

17 The study was conducted as a randomized, double-blind, placebo-controlled clinical trial. Thirty (30)  
18 healthy subjects were enrolled who were willing to adhere to the protocol criteria and who meet all the  
19 inclusion criteria and none of the exclusion criteria.

20 **Inclusion criteria:** Male and female adult healthy volunteers, aged between 25-55 years and BMI  
21 between 20-27 kg/m<sup>2</sup> (both inclusive), mixed diet consuming non-smokers, willing to come for regular  
22 follow up visits and, avoid the prebiotic and probiotic food supplements, laxatives and foods having  
23 laxative effects. Subjects able to give written informed consent.

24 **Exclusion criteria:** No gastrointestinal complaints like colonic irritation, not taking any medication with  
25 gastrointestinal activity like laxatives, had not taken antibiotics for 3 months before starting the study,  
26 consumption of yogurt, curd, prebiotic or probiotic supplements as part of their daily diet, not  
27 participated in a clinical study during the preceding 90 days and not willing to abide by the study  
28 procedures or not willing to provide stool samples for the study. Pregnancy and lactating, presently  
29 suffering from any inflammatory disorders and mental illness, and history of drug or alcohol abuse in  
30 the last 6 months were also considered. Randomization of subjects was done to receive either *B.*  
31 *coagulans* MTCC 5856 or Placebo. Subjects were administered one capsule of *B. coagulans* MTCC  
32 5856 or Placebo orally once daily after food at the night. (Fig.1)

### 33 **Randomization**

34 Patients (N=30) were randomized into two groups, active and placebo. The study groups, investigators,  
35 and other staff were blinded to the group assignment.

### 36 **Laboratory assessments**

37 Subjects visited four times during the study duration, i.e., screening (-3days), baseline -visit 2 (day 0), visit

38 3 (day 14), and final visit (day 28). Vital signs, including blood pressure, respiratory rate, pulse rate,  
39 physical examination, were measured at all 4 visits and any abnormal lab/diagnostic parameters were  
40 considered for safety evaluations. Subject's demographics were recorded at screening and final visits.  
41 Medical and medication history was documented at the screening visit. The routine laboratory parameters  
42 of safety, i.e., hematology, lipid profile, serum biochemistry, human immunodeficiency virus, hepatitis  
43 B-virus, and hepatitis C-virus, 12-lead electrocardiogram were measured using standard laboratory  
44 techniques at screening and final visit. Urine test for pregnancy was performed on female volunteers  
45 of childbearing potential at screening and final visit. Adverse effects, if any, were recorded at each  
46 study visit (Table 1). All the tests were carried out as per the standard protocol.

47 For the analysis of serum biomarkers, hsCRP, IL-10, and TNF- $\alpha$  blood samples were collected from  
48 subjects at baseline and final visit. The serum biomarker test were carried out using ELISA following  
49 protocols from the manufacture.

50 Subject Abdominal Health Questionnaire and the Bristol Stool Chart were assessed at baseline and final  
51 visit.

52  
53 For RT-PCR and 16S Illumina based sequencing Next Generation Sequencing (NGS), fecal samples  
54 were collected before dosing baseline and final visit (Table 1). All the fecal samples collected from  
55 subjects in fecal Collection Tube DNA/RNA Shield™ (Zymo Research) were stored at -80°C for  
56 prolonged storage.

57

58 **Enumeration of *Bacillus coagulans***

59 **RNA extraction for the rRNA-targeted reverse transcription-quantitative PCR (RT-qPCR)**

60 The RNA extraction from the fecal samples is optimized using a standard Trizol method, Qiagen  
61 RNeasy kit column, and NucleoSpin RNA stool kit. The RNA extracted using the NucleoSpin RNA  
62 stool kit was found to be optimal for the qPCR process.

63 RNA was isolated using a Nucleospin Fecal RNA kit, following the guidelines as per manufacturer  
64 guidelines. Briefly, the thawed sample was resuspended in a solution containing 346.5 of RLT buffer  
65 (Qiagen Sciences, Germantown, MD), 3.5 $\mu$ L of mercaptoethanol (Sigma-Aldrich Co.St. Louis, MO),  
66 and 100 $\mu$ L of Tris-EDTA buffer. Glass beads (300 mg; diameter,0.1 mm) (BioSpec Products, Inc.,  
67 Bartlesville, OK) were added to the suspension, and the mixture was vortexed vigorously for 60 s using  
68 a Fast Prep FP 120 (BIO101, Vista, CA) at a power level of 5.0. Acid phenol (500 $\mu$ L, Wako Pure  
69 Chemical Industries, Ltd.) was added, and the mixture was incubated for 10 min at 60°C. After  
70 incubation, the mixture was cooled on ice for 5 min and added to 100 $\mu$ L of chloroform: isoamyl alcohol  
71 (24:1). After centrifugation at 12,000xg for 10 min at 4°C, 450 $\mu$ L of supernatant was collected and added  
72 to an equal volume of chloroform, isoamyl-alcohol. After centrifugation at 12,000xg for 5 min, 400 $\mu$ L  
73 of supernatant was collected and subjected to isopropanol precipitation. Finally, the nucleic acid fraction  
74 was suspended in 1 mL of nuclease-free water (Ambion, Inc., Austin, TX). The following DNase  
75 treatment was skipped in this study, because we confirmed that untreated and DNase-treated samples  
76 showed identical results in the preliminary experiments, indicating that contaminating DNA does not  
77 affect RT-qPCR quantification. The extracted RNA was quantified, and quality was assessed by Tape  
78 station and Bioanalyser.

79

### 80 **16S rRNA specific primer design**

81 Primer was designed by using 16S rRNA sequences obtained from the NCBI database for the Bacillaceae  
82 family and constructed multiple alignments of the target groups and reference *Bacillus coagulans* 16S

83 rRNA with the ClustalW program. The ClustalW alignment is shown in Supplementary Fig.1. After  
84 comparing the sequences, potential primer target sites were identified for specific detection of *Bacillus*  
85 *coagulans*. The designed primer specificity was assessed by performing primer BLAST against the Non-  
86 Redundant database by submitting the sequences to the NCBI Primer-BLAST program.

## 87 **Establishment of an analytical system for the human fecal microbiota by Quantitative Reverse** 88 **Transcription PCR**

89 RT-qPCR was conducted in a one-step reaction using Super Script IV One-Step RT-PCR method. The  
90 methodology involves the use of 16S *B. coagulans* specific reverse primer for the cDNA conversion and  
91 its direct detection by standard SYBR Green chemistry. Briefly, 10ng of the extracted RNA was taken  
92 in a tube containing 1  $\mu$ L of 2 mM 16S rRNA reverse primer, and the RNA-primer mix was incubated  
93 at 65°C for 5 minutes and chilled on ice for 1 minute. The reverse transcriptase mix containing 4  $\mu$ L of  
94 5X SSIV buffer, 1  $\mu$ L of 100mM DTT, 1  $\mu$ L of Ribonuclease inhibitor and 1  $\mu$ L of SuperScript IV  
95 reverse transcriptase (200U/ $\mu$ L) was added. The reaction mix was incubated at 55°C for 15 minutes.  
96 Further, reverse transcriptase is inactivated by incubating the tubes at 80°C for 10 min. For qPCR  
97 reaction, 2  $\mu$ L of the cDNA is used, and the Agilent Brilliant SYBR Green dye is used for the  
98 amplification detection. All qPCR reactions were performed using the Agilent Stratagene 3005 system.  
99 Total RNA fractions extracted from the vegetative and sporulating bacterial cells at a dose corresponding  
100 to  $10^5$  cells were assessed by RT-qPCR. Using the standard curve for the seven serial dilutions was  
101 analyzed to check the efficiency of primer, and the same is used against all test samples to estimate the  
102 number of *Bacillus coagulans* cells. The amplified signal was judged as positive when it was more than  
103 that of  $10^1$  standard cells and as negative when less than that of  $10^{-1}$  standard cells. The cell count

104 between  $10^{-1}$  - $10^4$  against the standard curve was defined as positive for *Bacillus coagulans*. The final  
105 cell count was estimated by the formula-

106 Total Cells = Number of Cells determined by Standard curve\* (Total yield/Total Weight of fecal matter  
107 used for extraction)

## 108 **Metagenome Sequencing**

### 109 **DNA extraction for the metagenome sequencing**

110 A fecal sample (approximately 500 $\mu$ L) was taken in a sterile 1.5mL vial, and 300 $\mu$ L (10mg/mL) of  
111 lysozyme (Sigma # L6876) was added. The sample tube was inverted mixed and incubated at room  
112 temperature for 30 minutes at 37°C. To this, 200 $\mu$ L of AL buffer was added and vortexed. Samples were  
113 subjected to Proteinase K treatment at 56°C for 2 h, followed by RNase treatment at 65°C for 20 min.  
114 The lysate was mixed well with 100% alcohol and loaded onto Qiagen DNeasy blood and tissue column  
115 (#69506). DNA was purified by the following steps provided in the manufacturer's guidelines. Finally,  
116 DNA was eluted in 1X TE buffer and stored at -20°C freezer. DNA was quantified by Nanodrop2000  
117 and analyzed on 0.8% agarose gel.

118

### 119 **Library preparation and sequencing**

120 Sequencing libraries were constructed by a two-step PCR-based workflow described as follows: 1.  
121 Round 1 PCR: The 16S rRNA gene V3-V4 regions were first amplified using region-specific proprietary  
122 primers developed at Genotypic Technology Pvt. Ltd., Bangalore, India, Briefly, using KAPA HiFi Hot  
123 Start PCR Kit (KAPA Biosystems Inc., Boston, MA USA), and 5 $\mu$ M primer concentration, 50ng of  
124 genomic DNA was amplified for 26 cycles. The amplicons thus generated were analyzed on 1.2%  
125 agarose gel.

126 2. Round 2 PCR for indexing: 1µL of 1:2 diluted round 1 PCR amplicons were amplified for 10 cycles  
127 to add Illumina sequencing barcoded adaptors (Nextera XT v2 Index Kit, Illumina, U.S.A.). Round 2  
128 PCR amplicons (sequencing libraries) were analyzed on 1.2% agarose gel. The libraries were normalized  
129 and pooled for multiplex sequencing. Finally, these pools were quantified using Qubit dsDNA HS assay  
130 and fluorometer (Thermo Fisher Scientific, MA, USA) and then diluted to 2nM final concentration using  
131 Resuspension Buffer (RSB-Illumina, CA, USA). The normalized sample was denatured for 5 minutes  
132 using 0.2 N NaOH and neutralized by HT1 Buffer (Illumina, CA, USA). Denatured libraries were further  
133 diluted 13pM concentration for loading. Samples were then loaded into an Illumina MiSeq v3 600 cycles  
134 cartridge (Illumina, CA, USA). The flow cell and the PR2 buffer were placed in the designated slots in  
135 the machine and the run was performed in paired-end mode with 275 bp read length for each of forward  
136 (Read 1) and reverse (Read 2) reads. After the completion of the sequencing run, the data were  
137 demultiplexed using bcl2fastq software v 2.20 and Fast Q files were generated based on the unique dual  
138 barcode sequences. The sequencing quality was assessed using Fast QC v0.11.8 software. The adapter  
139 sequences were trimmed and bases above Q30 were considered and low-quality bases were filtered off  
140 during reading pre-processing and used for downstream analysis.

141

## 142 **Metagenome analysis**

143 From the Illumina paired-end raw reads of 52 samples, the reads having a V3-V4 primer sequence and  
144 high-quality bases were filtered. Short overlapping forward and reverse reads coming from the same  
145 fragment were joined using Fastq-join<sup>24</sup> to form sequences of the V3-V4 hypervariable 16S rRNA  
146 region. These stitched reads were considered for microbiome search using the QIIME<sup>25</sup> pipeline. The  
147 query sequences were clustered using the UCLUST<sup>26</sup> method against a curated chimera free 16s rRNA  
148 database (Greengenes<sup>27</sup>v 13.8). The taxonomies were assigned using the RDP<sup>28</sup> classifier to these

149 clusters at  $\geq 97\%$  sequence similarity against the reference database, which resulted in the generation  
150 of a biom file that was further used for advanced analysis and visualization. The biom file contains  
151 information about the number of reads assigned to particular taxa. The details such as reads utilized in  
152 the identification of microbiome and the number of OTUs picked for each sample were identified using  
153 QIIME scripts. Relative abundance from phylum to species was calculated from read counts assigned to  
154 OTU is divided by total utilized reads for microbiome search. The biom was utilized further for advanced  
155 analysis and visualization. The filtered rarefied biom at depth of 22,000 sequences/sample was used for  
156 the calculation of alpha diversity indices using various metrics i.e., Shannon, Simpson, chao1 and beta-  
157 diversity.

158

### 159 **Comparative analysis across a group of samples**

160 The comparative analysis was performed by two ways to identify the abundance of specific species in  
161 the samples. From the 52 samples, the samples belong to the active and placebo groups are compared.  
162 This comparison was performed by considering the difference of relative abundance between baseline  
163 and final visit samples to compare between active and placebo groups. Further, the baseline and final  
164 visit samples of active group and placebo group were compared. This comparison provides a difference  
165 in taxonomy abundance between baseline and final visit of samples. The main focus of the comparative  
166 analysis was to quantify some of the bacterial species that predominate the human intestine (*Clostridium*  
167 *coccoides* group, *Clostridium Leptum* subgroup, *Bacteroides fragilis* group, *Bifidobacterium* group,  
168 *Atopobium* cluster, *Eubacterium recalcitrans-C-histoliticum* subgroup and *Prevotella*), eight potential  
169 pathogens (*Clostridium difficile*, *Clostridium perfringens*, *Enterobacteriaceae*, *Enterococcus* spp.,  
170 *Streptococcus* spp., *Staphylococcus* spp., *Escherichia coli* and *Pseudomonas* spp.) and few Lactobacilli



171 groups (*L. gasseri* subgroup, *L. brevis*, *L. casei* subgroup, *L. fermentum*, *L. fructivorans*, *L. plantarum*  
172 subgroup, *L. reuteri* subgroup, *L. ruminis* subgroup and *L. sakei* subgroup).

173

#### 174 **Bioinformatics analysis**

175 Alpha diversity was calculated using different matrices i.e. Shannon, Simpson, Chao1 and observed  
176 species. Beta diversity was determined by principal coordinate analysis using unweighted and weighted  
177 UniFrac metrics. Emperor 3D viewer was used to visualize the plots. To determine the statistical  
178 significance between the two groups, taxon differential abundance across the groups was performed in  
179 QIIME (QIIME: group significance.py) to examine whether observation counts (i.e., OTUs and  
180 Microbial taxon) are significantly different between the groups (eg., Baseline visit, and Final visit). The  
181 OTU table prior to final community quality control was collapsed at each taxonomic level (i.e., Phylum–  
182 nus; QIIME: collapse\_taxonomy.py), with counts representing the relative abundance of each microbial  
183 taxon differences in the mean abundance of taxa between sample groups were calculated using Kruskal-  
184 Wallis nonparametric statistical tests. The taxa were ranked with p-values of most to least significant  
185 ( $p < .05$ ) are provided alongside false discovery rate and Bonferroni corrected p-values, and then the taxon  
186 was ranked from most to least significant ( $p < .05$ ).
