# Supplementary material for: Probiotic modulation of gut microbiota by Bacillus coagulans MTCC 5856 in healthy subjects: A randomized, double-blind, placebo-control study
Source: PubMed Central journal article supplement (PMC10194586; doi:10.1097/md.0000000000033751), 2023-05-17
Supplement: medi-102-e33751-s002.pdf [file medi-102-e33751-s002.pdf]

## Phylum Level Bar Plot

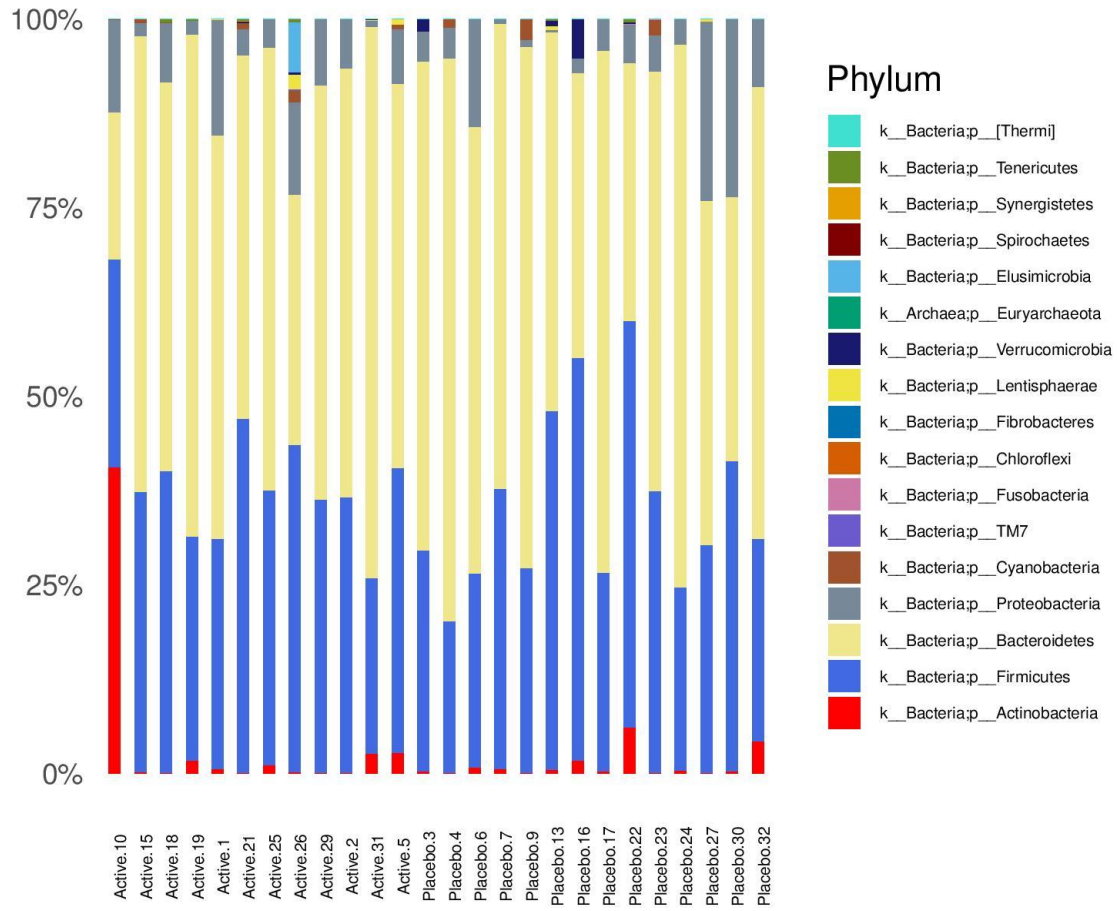

**Figure S1:** Microbial composition of active and placebo group at the phylum level with corresponding relative percentages using the relative abundance values (y-axis) for all the samples (x-axis) with respect to their baseline and final visit.
