# Supplementary material for: Probiotic modulation of gut microbiota by Bacillus coagulans MTCC 5856 in healthy subjects: A randomized, double-blind, placebo-control study
Source: PubMed Central journal article supplement (PMC10194586; doi:10.1097/md.0000000000033751), 2023-05-17
Supplement: medi-102-e33751-s004.pdf [file medi-102-e33751-s004.pdf]

**Table S1. Relative Abundance significantly different taxa between active and placebo group.**

| Taxonomy                                   |                       |                     |                      |                         |                    | OTU     | Active Vs Placebo<br>P value<br>(Kruskalwallis) | Active Samples |        |                  | Placebo samples |        |                  |
|--------------------------------------------|-----------------------|---------------------|----------------------|-------------------------|--------------------|---------|-------------------------------------------------|----------------|--------|------------------|-----------------|--------|------------------|
| Phylum                                     | Class                 | Order               | family               | genus                   | species            |         |                                                 | Average        | SD     | No of<br>samples | Average         | SD     | No of<br>samples |
| <b><i>Clostridium</i> spp.</b>             |                       |                     |                      |                         |                    |         |                                                 |                |        |                  |                 |        |                  |
| Firmicutes                                 | Clostridia            | Clostridiales       | Veillonellaceae      |                         |                    | 4300127 | 0.00273                                         | 0.0730         | 0.2034 | 18               | 0.0071          | 0.0248 | 6                |
| Firmicutes                                 | Clostridia            | Clostridiales       | Clostridiaceae       |                         |                    | 173921  | 0.00523                                         | 0.0040         | 0.0084 | 7                | 0.0001          | 0.0004 | 1                |
| Firmicutes                                 | Clostridia            | Clostridiales       | Lachnospiraceae      | <i>Blautia</i>          |                    | 177905  | 0.00591                                         | 0.0016         | 0.0014 | 8                | 0.0002          | 0.0004 | 2                |
| Firmicutes                                 | Clostridia            | Clostridiales       | Veillonellaceae      | <i>Mitsuokella</i>      | <i>multacida</i>   | 13811   | 0.01388                                         | 0.6604         | 1.4367 | 20               | 0.0149          | 0.0192 | 18               |
| Firmicutes                                 | Clostridia            | Clostridiales       | Lachnospiraceae      | <i>Lachnospira</i>      |                    | 314095  | 0.01427                                         | 0.0542         | 0.0698 | 20               | 0.0184          | 0.0393 | 11               |
| Firmicutes                                 | Clostridia            | Clostridiales       | Ruminococcaceae      | <i>Rumino coccus</i>    |                    | 193336  | 0.01769                                         | 0.0056         | 0.0072 | 12               | 0.0050          | 0.0135 | 9                |
| Firmicutes                                 | Clostridia            | Clostridiales       | Clostridiaceae       | <i>Sarcina</i>          |                    | 300662  | 0.02163                                         | 0.0008         | 0.0013 | 4                | 0.0000          | 0.0000 | 0                |
| Firmicutes                                 | Clostridia            | Clostridiales       | Clostridiaceae       | <i>SMB53</i>            |                    | 345322  | 0.02390                                         | 0.0000         | 0.0000 | 0                | 0.0004          | 0.0006 | 5                |
| Firmicutes                                 | Clostridia            | Clostridiales       | Mogibacteriaceae     |                         |                    | 3805726 | 0.02390                                         | 0.0000         | 0.0000 | 0                | 0.0008          | 0.0012 | 5                |
| Firmicutes                                 | Clostridia            | Clostridiales       |                      |                         |                    | 583958  | 0.02461                                         | 0.0024         | 0.0041 | 13               | 0.0040          | 0.0046 | 17               |
| Firmicutes                                 | Clostridia            | Clostridiales       | Veillonellaceae      |                         |                    | 820764  | 0.02552                                         | 0.1433         | 0.2431 | 11               | 0.0005          | 0.0015 | 2                |
| Firmicutes                                 | Clostridia            | Clostridiales       | Lachnospiraceae      | <i>Coprococcus</i>      |                    | 842596  | 0.02614                                         | 0.0054         | 0.0130 | 11               | 0.0007          | 0.0011 | 6                |
| Firmicutes                                 | Clostridia            | Clostridiales       | Ruminococcaceae      |                         |                    | 191582  | 0.03161                                         | 0.0177         | 0.0205 | 11               | 0.0065          | 0.0122 | 11               |
| Firmicutes                                 | Clostridia            | Clostridiales       | Ruminococcaceae      | <i>Faecalibacterium</i> | <i>prausnitzii</i> | 365842  | 0.04616                                         | 0.0021         | 0.0030 | 10               | 0.0010          | 0.0014 | 8                |
| Firmicutes                                 | Clostridia            | Clostridiales       | Lachnospiraceae      |                         |                    | 577206  | 0.04800                                         | 0.0015         | 0.0016 | 9                | 0.0006          | 0.0009 | 7                |
| Firmicutes                                 | Clostridia            | Clostridiales       | Lachnospiraceae      | <i>Roseburia</i>        |                    | 3152469 | 0.04840                                         | 0.0000         | 0.0000 | 0                | 0.0006          | 0.0012 | 4                |
| Firmicutes                                 | Clostridia            | Clostridiales       | Clostridiaceae       | 02d06                   |                    | 181342  | 0.04840                                         | 0.0000         | 0.0000 | 0                | 0.0003          | 0.0005 | 4                |
| <b><i>Enterobacteriaceae</i></b>           |                       |                     |                      |                         |                    |         |                                                 |                |        |                  |                 |        |                  |
| Proteobacteria                             | Gamma proteo bacteria | Entero bacteriales  | Enterobacteriaceae   |                         |                    | 166908  | 0.051120                                        | 0.0003         | 0.0005 | 3                | 0.0000          | 0.0000 | 0                |
| Proteobacteria;                            | Gamma proteo bacteria | Entero bacteriales  | Enterobacteriaceae   | <i>Trabulsilla</i>      |                    | 687792  | 0.051120                                        | 0.0004         | 0.0008 | 3                | 0.0000          | 0.0000 | 0                |
| Proteobacteria;                            | Gamma proteo bacteria | Entero bacteriales  | Enterobacteriaceae   | <i>Erwinia</i>          | <i>solii</i>       | 4455895 | 0.051508                                        | 0.0005         | 0.0009 | 4                | 0.0000          | 0.0000 | 0                |
| <b><i>Enterococcus</i></b>                 |                       |                     |                      |                         |                    |         |                                                 |                |        |                  |                 |        |                  |
| Firmicutes                                 | Bacilli               | Lactobacillales     | Enterococcaceae      | <i>Enterococcus</i>     |                    | 1111582 | 0.28009                                         | 0.0002         | 0.0007 | 1                | 0.0000          | 0.0000 | 0                |
| <b><i>Escherichia coli</i></b>             |                       |                     |                      |                         |                    |         |                                                 |                |        |                  |                 |        |                  |
| Proteobacteria                             | Gamma proteo bacteria | Entero bacteriales  | Enterobacteriaceae   | <i>Escherichia</i>      | <i>coli</i>        | 114510  | 0.10343                                         | 0.0033         | 0.0029 | 14               | 0.0024          | 0.0050 | 7                |
| Firmicutes                                 | Erysipelo trichi      | Erysipelo trichales | Erysipelo trichaceae | <i>Eubacterium</i>      | <i>dolichum</i>    | 548587  | 0.09456                                         | 0.0000         | 0.0000 | 0                | 0.0004          | 0.0009 | 4                |
| Firmicutes                                 | Erysipelo trichi      | Erysipelo trichales | Erysipelo trichaceae | <i>Eubacterium</i>      |                    | 815422  | 0.35454                                         | 0.0000         | 0.0000 | 0                | 0.0001          | 0.0003 | 1                |
| Firmicutes                                 | Erysipelo trichi      | Erysipelo trichales | Erysipelo trichaceae | <i>Eubacterium</i>      | <i>biforme</i>     | 524884  | 0.49710                                         | 0.0959         | 0.2405 | 16               | 0.0130          | 0.0173 | 21               |
| <b><i>Faecalibacterium prausnitzii</i></b> |                       |                     |                      |                         |                    |         |                                                 |                |        |                  |                 |        |                  |
| Firmicutes                                 | Clostridia            | Clostridiales       | Ruminococcaceae      | <i>Faecalibacterium</i> | <i>prausnitzii</i> | 189092  | 0.01224                                         | 0.0003         | 0.0007 | 4                | 0.0028          | 0.0056 | 12               |
| <b><i>Lactobacillus</i> spp.</b>           |                       |                     |                      |                         |                    |         |                                                 |                |        |                  |                 |        |                  |
| Firmicutes                                 | Bacilli               | Lactobacillales     | Lactobacillaceae     | <i>Lactobacillus</i>    | <i>reuteri</i>     | 411486  | 0.28009                                         | 0.0001         | 0.0003 | 1                | 0.0000          | 0.0000 | 0                |
| Firmicutes                                 | Bacilli               | Lactobacillales     | Lactobacillaceae     | <i>Lactobacillus</i>    | <i>mucosae</i>     | 4358602 | 0.45746                                         | 0.0002         | 0.0004 | 2                | 0.0001          | 0.0003 | 1                |
| Firmicutes                                 | Bacilli               | Lactobacillales     | Lactobacillaceae     | <i>Lactobacillus</i>    |                    | 807795  | 0.51629                                         | 0.0005         | 0.0013 | 2                | 0.0039          | 0.0144 | 2                |
| Firmicutes                                 | Bacilli               | Lactobacillales     | Lactobacillaceae     | <i>Lactobacillus</i>    | <i>ruminis</i>     | 178213  | 0.53682                                         | 0.4276         | 0.8068 | 21               | 0.1918          | 0.3608 | 27               |
| Firmicutes                                 | Bacilli               | Lactobacillales     | Lactobacillaceae     | <i>Lactobacillus</i>    | <i>iners</i>       | 130864  | 0.86745                                         | 0.0086         | 0.0298 | 1                | 0.0001          | 0.0003 | 1                |
| <b><i>Prevotella</i></b>                   |                       |                     |                      |                         |                    |         |                                                 |                |        |                  |                 |        |                  |
| Bacteroidetes                              | Bacteroidia           | Bacteroidales       | Prevotellaceae       | <i>Prevotella</i>       | <i>stercorea</i>   | 2220494 | 0.00650                                         | 0.0489         | 0.0621 | 16               | 0.0075          | 0.0163 | 6                |
| Bacteroidetes                              | Bacteroidia           | Bacteroidales       | Prevotellaceae       | <i>Prevotella</i>       | <i>copri</i>       | 328035  | 0.04938                                         | 0.3021         | 0.6457 | 18               | 0.0101          | 0.0158 | 16               |
| <b><i>Akkermansia</i></b>                  |                       |                     |                      |                         |                    |         |                                                 |                |        |                  |                 |        |                  |
| Verruco microbia                           | Verruco microbiiae    | Verruco microbiale  | Verruco microbiaceae | <i>Akkermansia</i>      | <i>muciniphila</i> | 363731  | 0.48891                                         | 0.0113         | 0.0259 | 5                | 0.1306          | 0.4047 | 7                |
