# Supplementary material for: Probiotic modulation of gut microbiota by Bacillus coagulans MTCC 5856 in healthy subjects: A randomized, double-blind, placebo-control study
Source: PubMed Central journal article supplement (PMC10194586; doi:10.1097/md.0000000000033751), 2023-05-17
Supplement: medi-102-e33751-s005.pdf [file medi-102-e33751-s005.pdf]

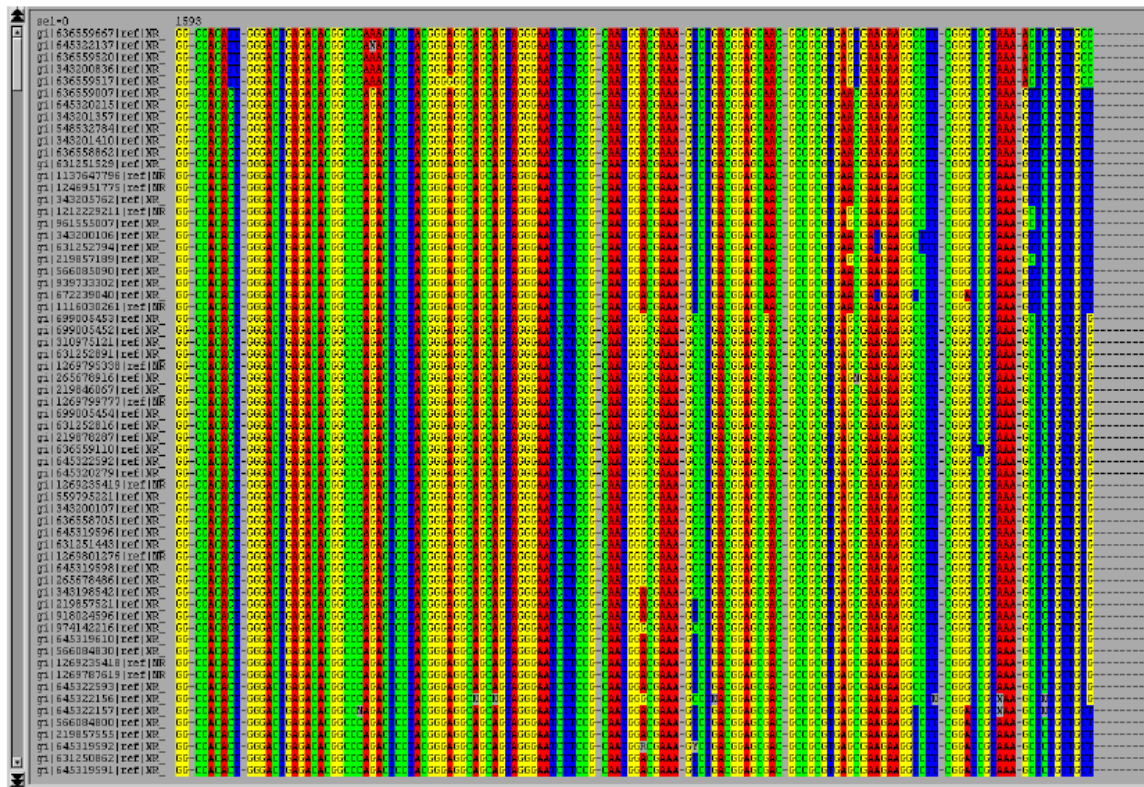

**Figure S3A:** Clustal W alignment view for the 16S rRNA region of Bacillaceae family.

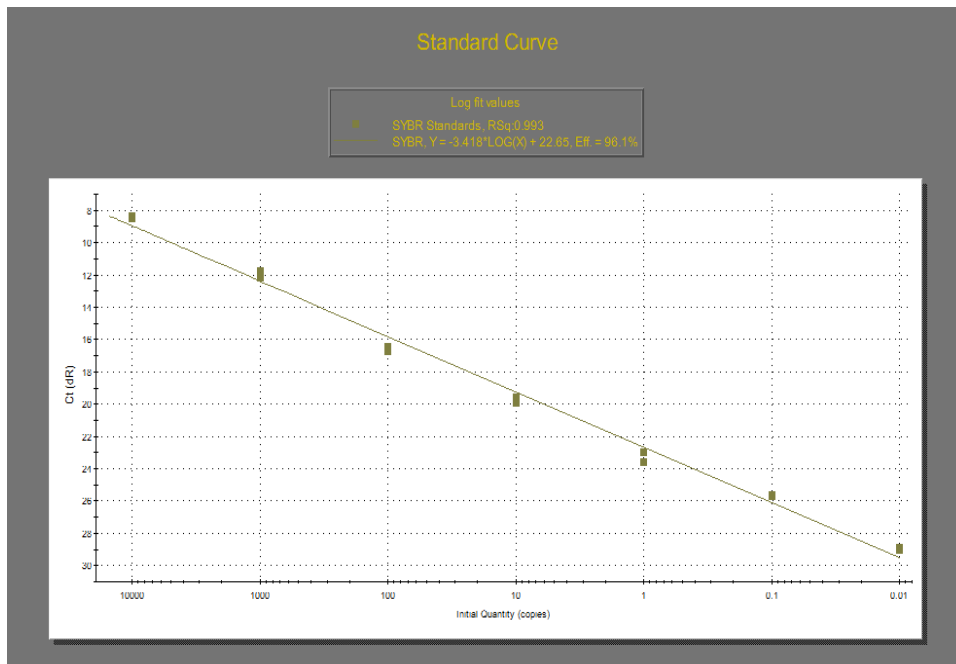

**Figure S3B:** Standard curve *B. coagulans* primer efficiency and validation.

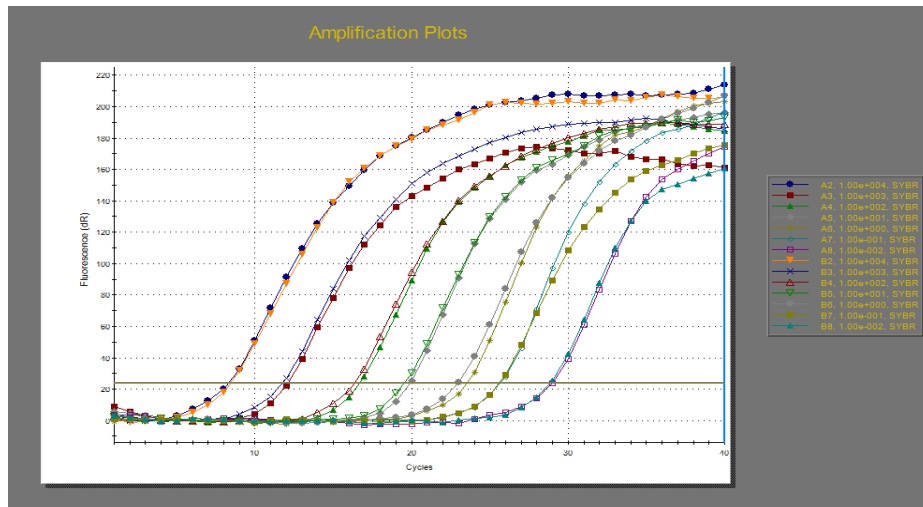

**Figure S3C:** *B. coagulans* cells: PCR – amplification plots.

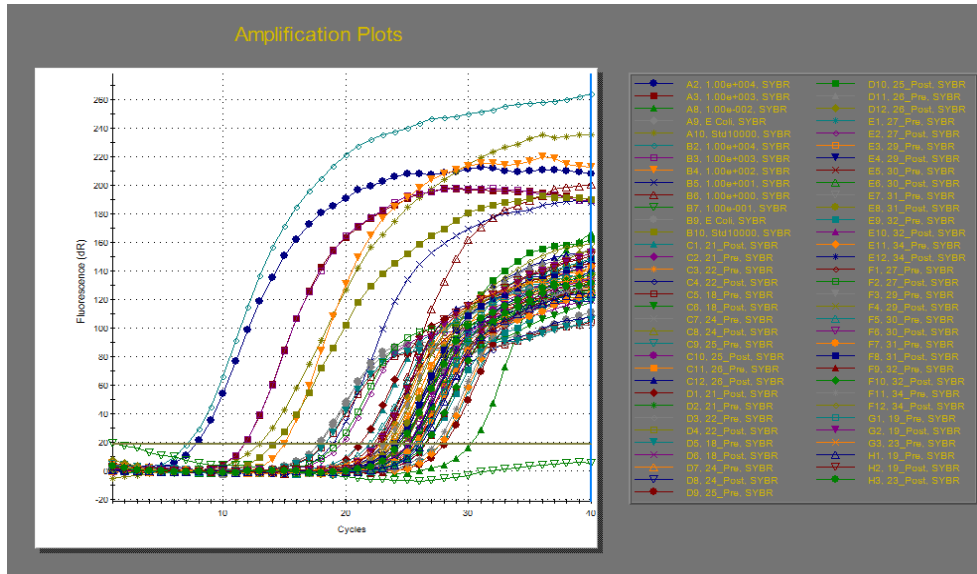

**Figure S3D:** PCR – Amplification plots of sample and standard.

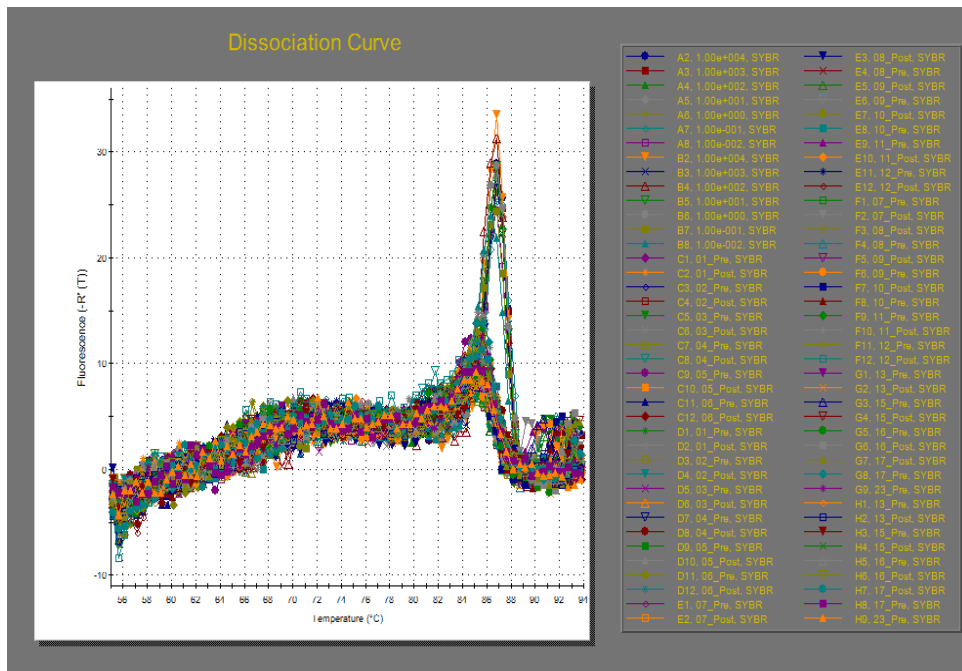

**Figure S3E:** PCR – Dissociation curve of sample and standard.
